# Supplementary material for: Enhancing the durability of Pt nanoparticles for water electrolysis using ultrathin SiO2 layers
Source: Royal Society of Chemistry journal article supplement (doi:10.1039/d3cy00996c), 2024-01-01
Supplement: d3cy00996c1.pdf [file d3cy00996c1.pdf]

## Supporting information

### Enhancing the durability of Pt nanoparticles for water electrolysis using ultrathin SiO<sub>2</sub> layers

Ming Li,<sup>a,b</sup> Saeed Saedy,<sup>a</sup> Shilong Fu,<sup>b</sup> Teise Stellema,<sup>a</sup> Ruud Kortlever\*<sup>b</sup> and J. Ruud van Ommen<sup>a</sup>

---

<sup>a</sup> Department of Chemical Engineering, Faculty of Applied Sciences, Delft University of Technology, Van der Maasweg 9, 2629 HZ, Delft, The Netherlands

<sup>b</sup> Process & Energy Department, Faculty of Mechanical, Maritime and Materials Engineering, Delft University of Technology, Leeghwaterstraat 39, 2628 CB Delft, The Netherlands. E-mail: R.Kortlever@tudelft.nl

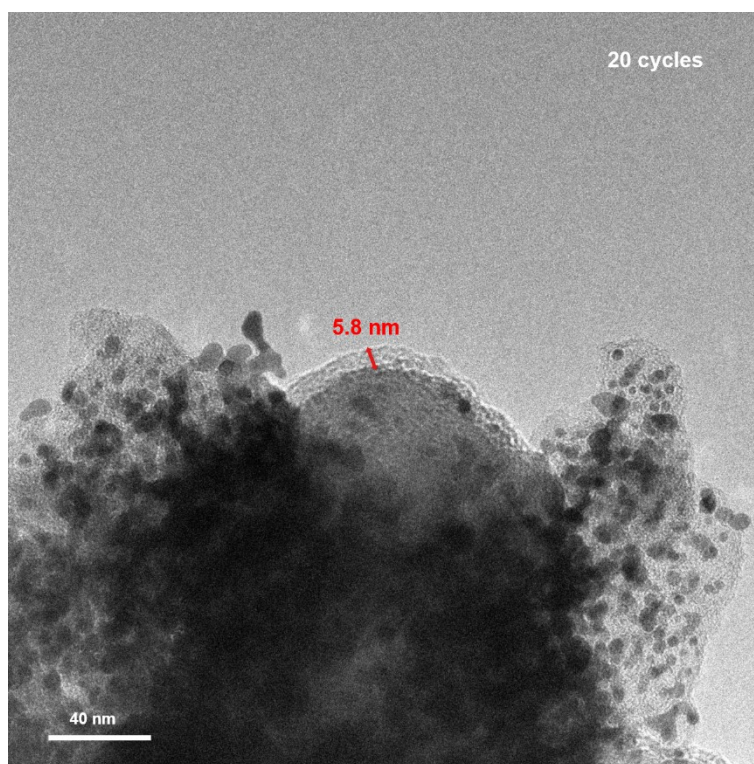

Figure S1. Film thickness determination, TEM image of the Pt/CB catalyst after 20 ALD cycles. Sampling from the outermost surface of the catalyst ink spot.

**Table S1:** ALD experimental conditions. (RT indicates room temperature)

| Material         | Precursor<br>(T, °C)   | Co-reactant<br>(T, °C)         | T <sub>reaction</sub><br>(°C) | Pulse Time (s)<br>(Precursor-N <sub>2</sub> -Co-<br>reactant-N <sub>2</sub> ) | Flow<br>rate(L/min) |
|------------------|------------------------|--------------------------------|-------------------------------|-------------------------------------------------------------------------------|---------------------|
| SiO <sub>2</sub> | SiCl <sub>4</sub> (RT) | H <sub>2</sub> O vapor<br>(RT) | 100                           | 15-60-30-60                                                                   | 0,5-0,5-0,5-<br>0,5 |

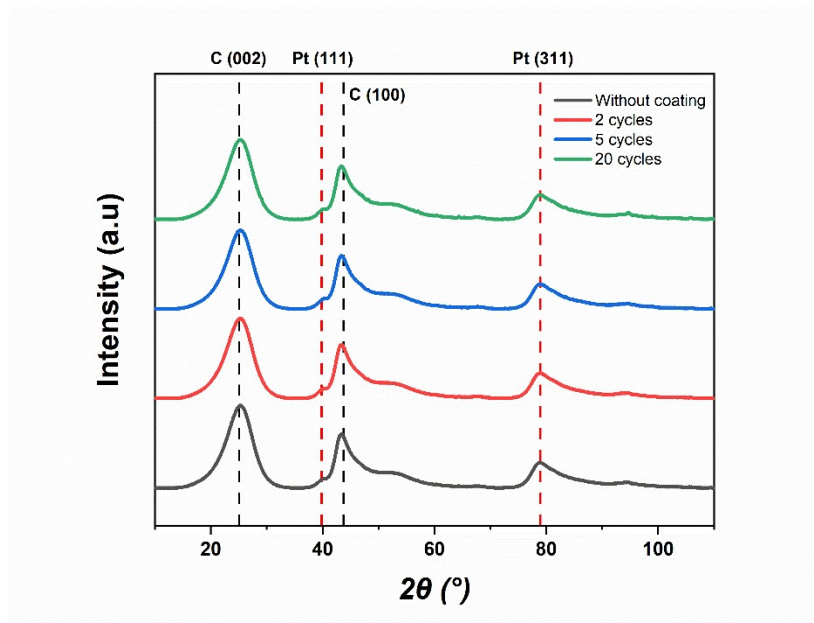

Figure S2. X-ray diffraction patterns of the original Pt/CB catalyst and the Pt/CB catalyst after applying variant numbers of ALD cycles.

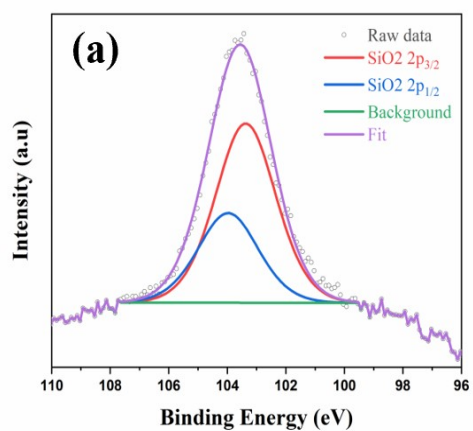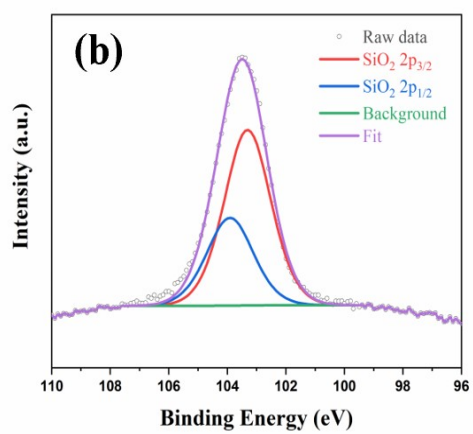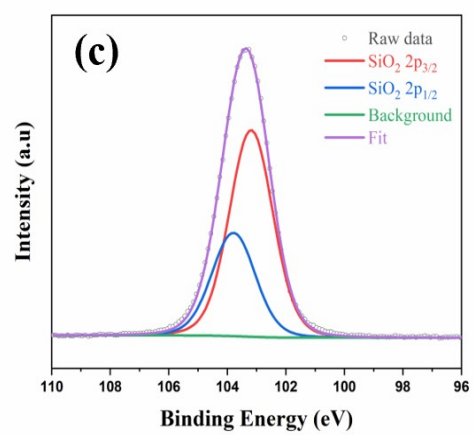

Figure S3. The Si 2p XPS spectra of the Pt/CB catalyst with SiO<sub>2</sub> coating: (a) 2 ALD cycles, (b) 5 ALD cycles, and (c) 20 ALD cycles of SiO<sub>2</sub> ALD coating.

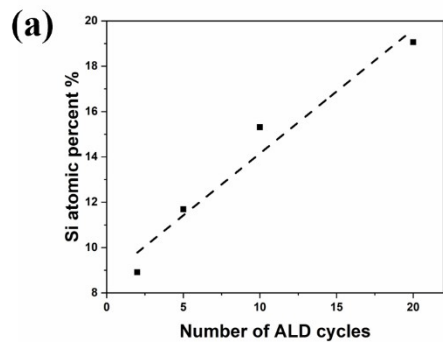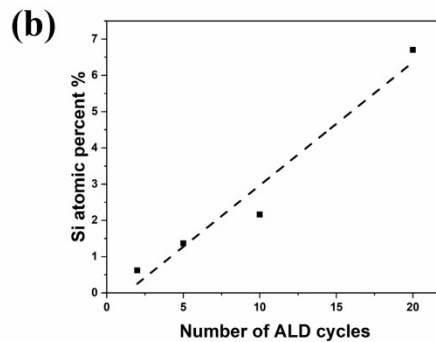

Figure S4. Growth per ALD cycle of  $\text{SiO}_2$  deposition on the surface of Pt/CB catalyst, based on (a) XPS and (b) EDS characterization, respectively.

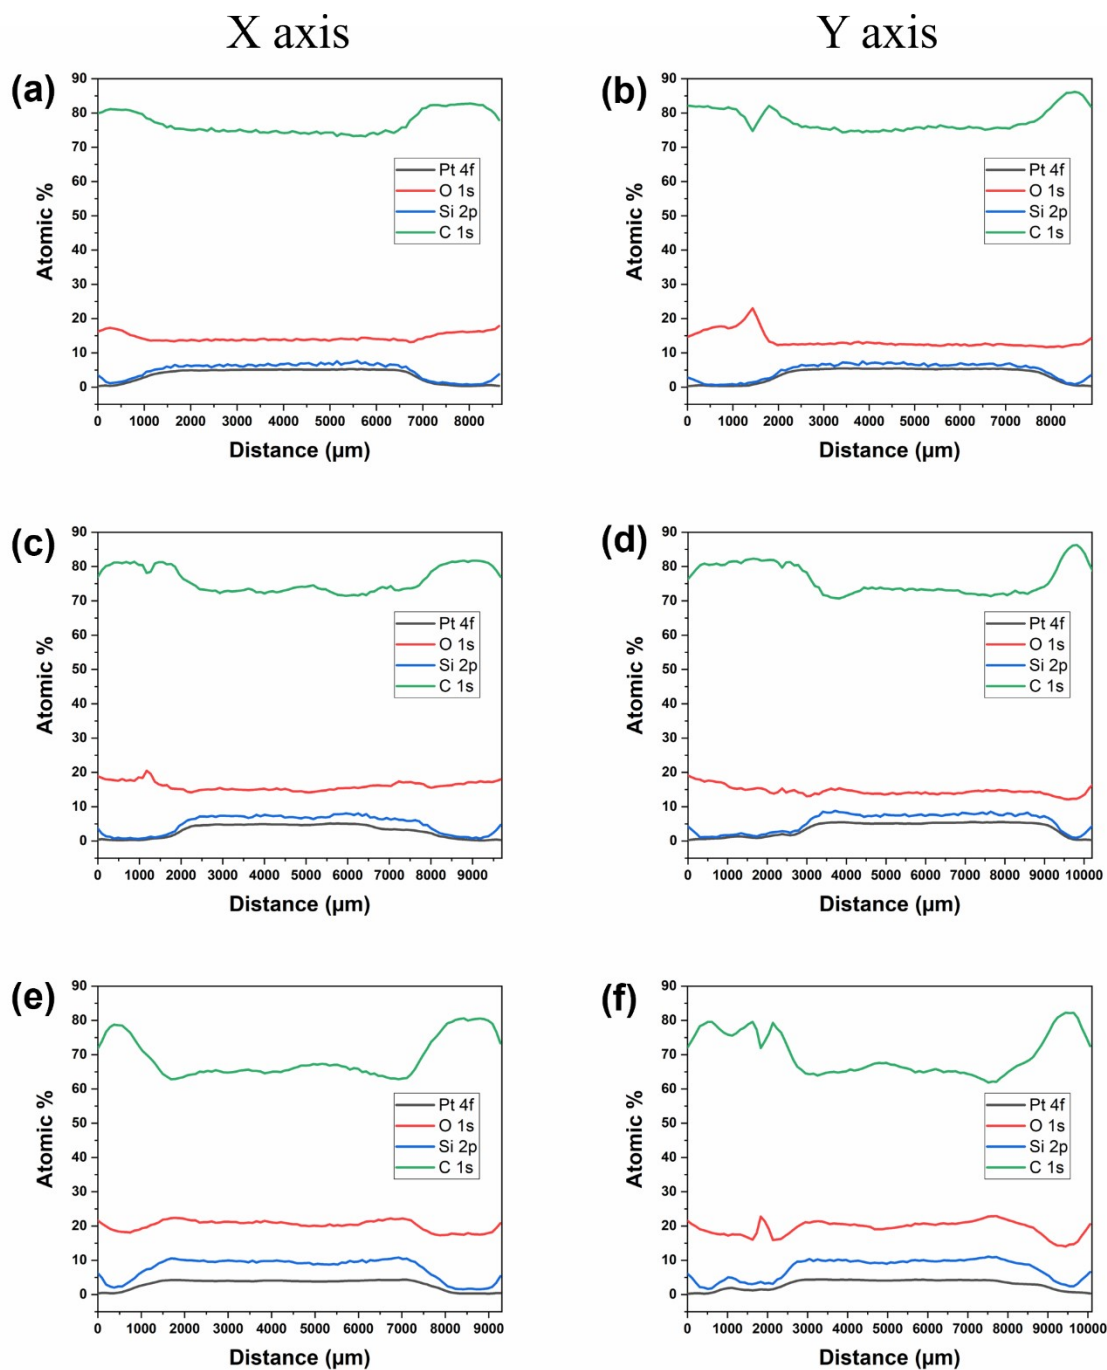

Figure S5. Crossover XPS line scan of the Pt/CB catalyst drop casted on the glassy carbon substrate after applying variant numbers of SiO<sub>2</sub> ALD cycles: (a, b) 2 ALD cycles, (c, d) 5 ALD cycles, and (e, f) 20 ALD cycles scanning from X and Y axis.

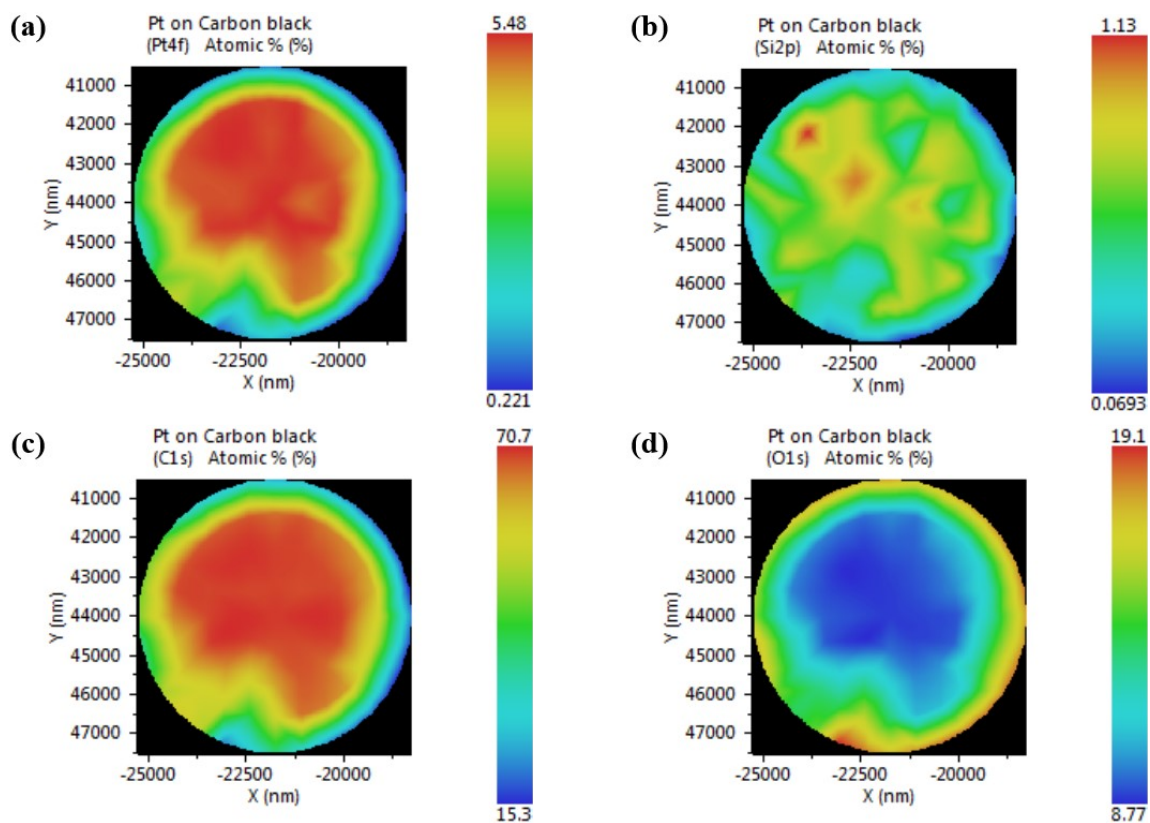

Figure S6. XPS area scans of the original Pt/CB catalyst on glassy carbon electrode; (a) Pt 4f signal; (b) Si 2p signal; (c) C 1s signal; (d) O 1s signal scanned from the catalyst spot and its margin region.

Two red spots shown in Figure S5b represent one atomic percent of Si on the surface of the sample and this might come from contamination from the lab environment, like small flakes of glass wool.

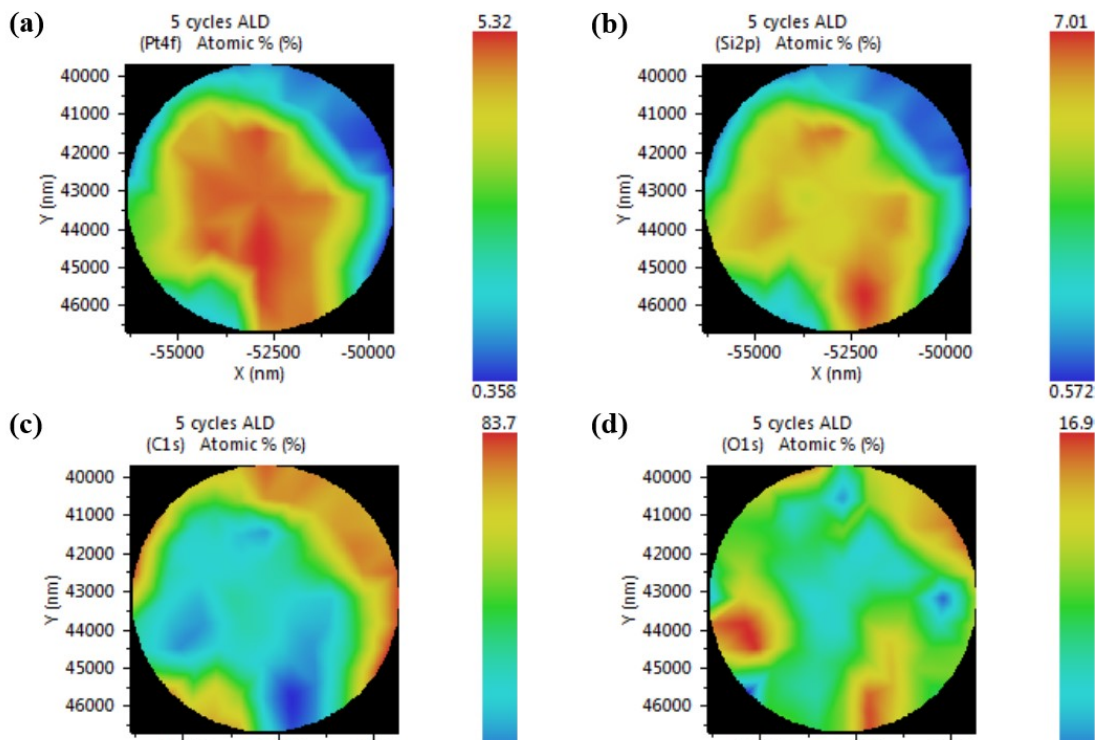

Figure S7. XPS area scans of the Pt/CB catalyst after 5 cycles of  $\text{SiO}_2$  ALD on glassy carbon electrode; (a) Pt 4f signal; (b) Si 2p signal; (c) C 1s signal; (d) O 1s signal scanned from the catalyst spot and its margin region.

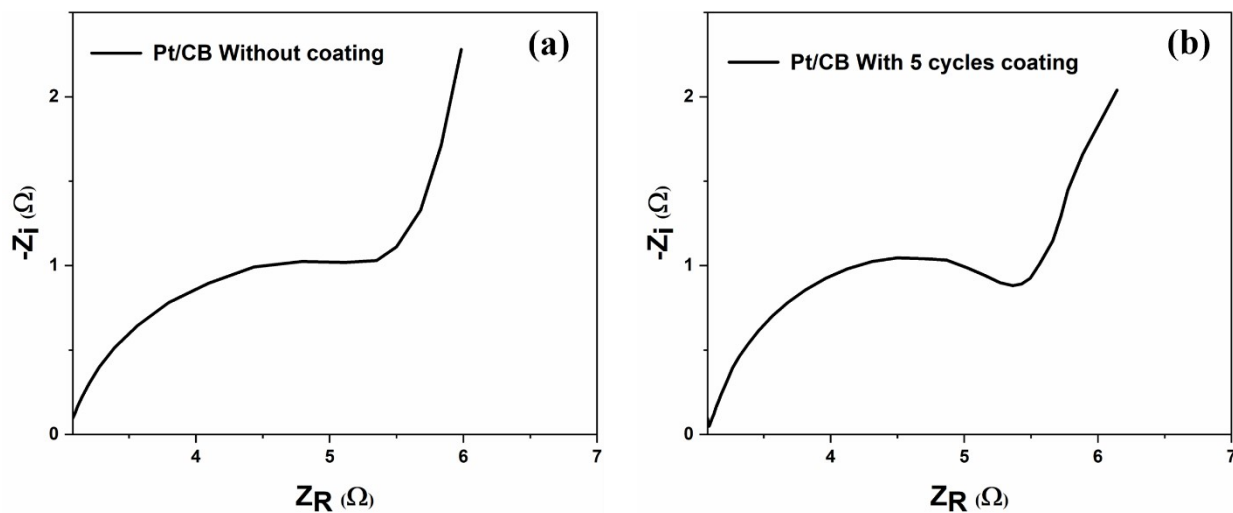

Figure S8. The Nyquist plots of Pt/CB catalyst with and without 5 cycles ALD coating.



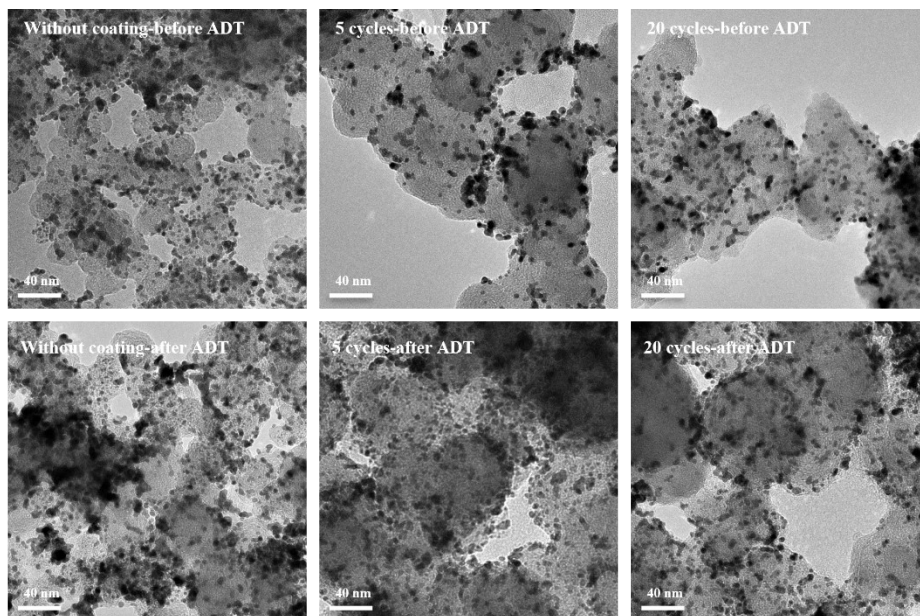

Figure S9. TEM images of the Pt/CB catalyst before (top row) and after (bottom row) accelerated durability tests.

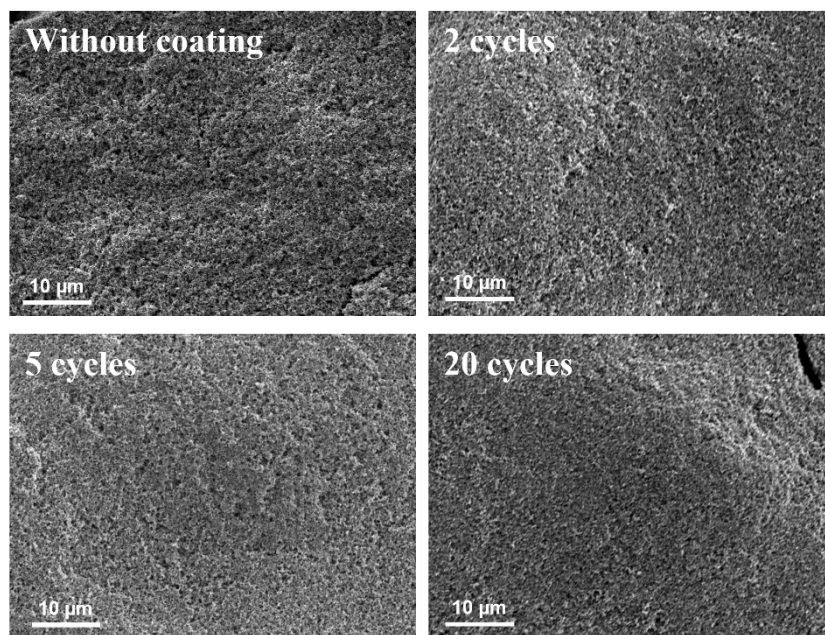

Figure S10. SEM images of the Pt/CB catalyst before accelerated durability tests.

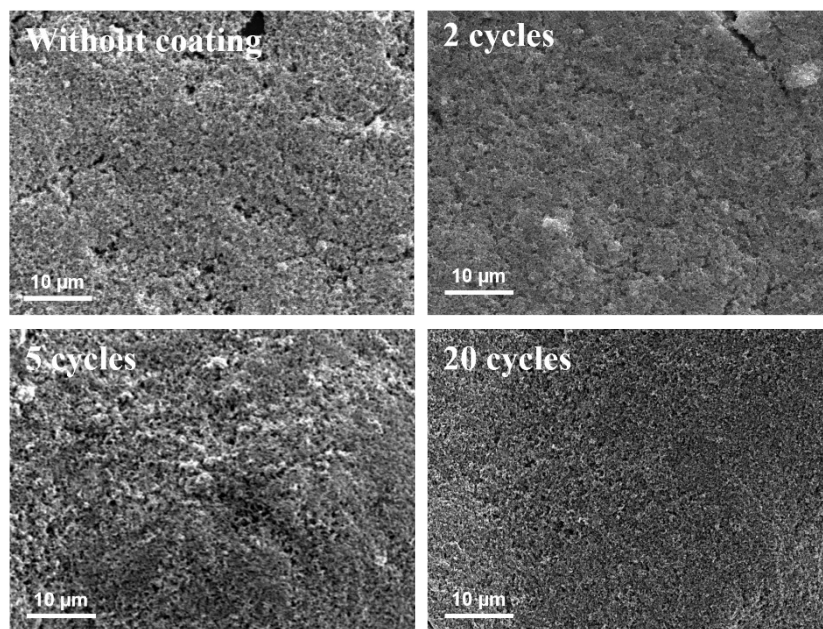

Figure S11. SEM images of the Pt/CB catalyst after accelerated durability tests.
